# Supplementary material for: Soil Mite (Acari: Mesostigmata) Communities and Their Relationships with Some Environmental Variables in Experimental Grasslands from Bucegi Mountains in Romania
Source: MDPI journal article supplement (doi:10.3390/insects13030285), 2022-03-14
Supplement: s1 [file s1]

# Soil mite communities (Acari: Mesostigmata) and their relationship with some environmental variables in experimental grasslands from Bucegi Mountains in Romania

Insects

Manu M.<sup>1†</sup>, Băncilă R.I.<sup>2,3</sup>, Mountford O.<sup>4</sup>, Maruşca T.<sup>5</sup>, Blaj V.A.<sup>5</sup>, Onete M.<sup>1†</sup>

<sup>1</sup>Romanian Academy, Institute of Biology Bucharest, Department of Ecology, Taxonomy and Nature Conservation, street Splaiul Independenței, no. 296, zip code 0603100, PO-BOX 56-53, fax 040212219071, tel. 040212219202, Bucharest, Romania, email: minodoramanu@gmail.com and marilena.onete@gmail.com

<sup>2</sup>Faculty of Natural Sciences, University Ovidius Constanța, Constanța, Romania

<sup>3</sup>Department of Biospeleology and Soil Edaphobiology, "Emil Racoviță" Institute of Speleology, Romanian Academy, 13 Septembrie Road, No. 13, 050711, Bucharest, Romania, bancila\_ralucaioana@yahoo.com

<sup>4</sup>Centre for Ecology and Hydrology, Maclean Building, Benson Lane, Crowmarsh Gifford, Wallingford, Oxfordshire, OX10 8BB, UK, email: om@ceh.ac.uk

<sup>5</sup>Grassland Research and Development Institute Braşov, Romania, Cucului str., No. 5, 500128, Braşov, Romania, email: maruscat@yahoo.com; blajadi@pajisti-grassland.ro

Corresponding author: minodoramanu@gmail.com and marilena.onete@gmail.com

† Authors with equal contribution in the production of the article

**Table S1.** Numerical abundance (Ab.) and frequency (F%) of Mesostigmata mites from experimental plots, 2017.

| Species                                                         | Code     | CG  |    | A   |    | B   |    | C   |    | D   |    | Total |    |
|-----------------------------------------------------------------|----------|-----|----|-----|----|-----|----|-----|----|-----|----|-------|----|
|                                                                 |          | Ab. | F% | Ab.   | F% |
| <i>Alliphis haleri</i> (G. & R.Canestrini, 1881)                | Allihale |     |    |     |    |     |    |     |    | 9   | 6  | 9     | 6  |
| <i>Arctoseius cetratus</i> (Sellnick, 1940)                     | Arctcert | 38  | 20 | 37  | 28 | 17  | 18 | 42  | 26 | 176 | 52 | 310   | 90 |
| <i>Arctoseius insularis</i> (Willmann, 1952)                    | Arctinsu |     |    |     |    |     |    | 13  | 4  | 6   | 2  | 19    | 6  |
| <i>Cheroseius bryophilus</i> Karg, 1969                         | Cherbryo |     |    |     |    |     |    | 2   | 4  | 62  | 16 | 64    | 20 |
| <i>Dendrolaelaps foveolatus</i> (Leitner, 1949)                 | Dendfove |     |    |     |    |     |    | 118 | 6  | 96  | 6  | 214   | 12 |
| <i>Dendrolaelaps</i> sp.                                        | Dendsp   |     |    |     |    | 17  | 8  | 4   | 6  | 4   | 4  | 25    | 18 |
| <i>Dinychus carinatus</i> Berlese, 1903                         | Dinyca   |     |    |     |    |     |    | 2   | 4  | 6   | 4  | 8     | 8  |
| <i>Dinychus</i> sp.                                             | Dinyasp  |     |    |     |    |     |    |     |    | 9   | 14 | 9     | 14 |
| <i>Gamasellodes insignis</i> (Hirschmann, 1963)                 | Gamainsi |     |    |     |    |     |    |     |    | 10  | 2  | 2     | 2  |
| <i>Gamasellodes bicolor</i> (Berlese, 1918)                     | Gamabico |     |    |     |    |     |    |     |    | 2   | 2  | 10    | 2  |
| <i>Geolaelaps noll</i> (Karg, 1962)                             | Geolnoll | 3   | 6  | 85  | 30 | 8   | 6  | 31  | 18 | 65  | 18 | 192   | 64 |
| <i>Geolaelaps praesternalis</i> Willmann, 1949                  | Geolprae | 1   | 2  | 27  | 4  |     |    |     |    | 3   | 6  | 31    | 10 |
| <i>Iphidozercon gibbus</i> (Berlese, 1903)                      | Iphigibb |     |    |     |    | 3   | 6  |     |    | 4   | 2  | 7     | 6  |
| <i>Leioseius magnanalis</i> (Evans, 1958)                       | Leiomagn |     |    |     |    |     |    |     |    | 1   | 2  | 1     | 2  |
| <i>Lysigamasus conus</i> Karg, 1971                             | Lysiconu | 3   | 6  | 2   | 4  | 1   | 2  | 22  | 14 | 63  | 32 | 91    | 42 |
| <i>Neopodocinum mrciaki</i> Selinick, 1968                      | Neopmrch |     |    |     |    |     |    |     |    | 2   | 4  | 79    | 32 |
| <i>Mixozzercon sellnicki</i> (Schweizer 1948)                   | Mixosell | 5   | 8  | 41  | 18 | 3   | 2  | 30  | 10 |     |    | 2     | 4  |
| <i>Olopachys vysotskajae</i> Koreleva, 1976                     | Olovyso  |     |    | 6   | 2  |     |    |     |    |     |    | 6     | 2  |
| <i>Onchodellus</i> sp.                                          | Onchsp   |     |    |     |    |     |    |     |    | 4   | 4  | 4     | 4  |
| <i>Onchodellus karawaiiewi</i> Berlese, 1920                    | Onchkara |     |    | 1   | 2  |     |    |     |    |     |    | 1     | 2  |
| <i>Oodinychus</i> sp.                                           | Oodisp   |     |    |     |    |     |    |     |    | 1   | 2  | 1     | 2  |
| <i>Pergamasus laetus</i> Juvara-Bals, 1970                      | Perglaet |     |    | 1   | 2  |     |    | 9   | 6  | 9   | 14 | 19    | 18 |
| <i>Pergamasus norvegicus</i> (Berlese, 1906)                    | Pergnorv |     |    |     |    |     |    |     |    | 10  | 10 | 10    | 12 |
| <i>Pergamasus quisquiliarum</i> (Canestrini & Canestrini, 1882) | Pergquis |     |    |     |    |     |    |     |    | 2   | 4  | 2     | 4  |

|                                                               |          |    |     |    |     |     |    |      |    |
|---------------------------------------------------------------|----------|----|-----|----|-----|-----|----|------|----|
| <i>Prozercon</i> sp.                                          | Prozsp   |    |     |    |     | 13  | 2  | 13   | 2  |
| <i>Pseudoparasitus sellnicki</i> (Bregetova & Koroleva, 1964) | Pseusell |    |     |    |     | 3   | 6  | 3    | 6  |
| <i>Uroobovella</i> sp.                                        | Uroosp   |    |     | 3  | 6   | 19  | 10 | 22   | 16 |
| <i>Veigaia planicola</i> Berlese, 1892                        | Veigplan |    |     |    |     | 1   | 2  | 4    | 2  |
| <i>Veigaia nemorensis</i> (C.L.Koch, 1836)                    | Veignemo |    |     |    |     | 4   | 2  | 1    | 2  |
| <i>Vulgarogamasus kraepelini</i> (Berlese, 1904)              | Vulgkrae |    | 4   | 2  |     |     |    | 4    | 2  |
| Total number of species                                       |          | 5  | 9   | 7  | 10  | 26  |    | 30   |    |
| Total no. of individuals                                      |          | 50 | 204 | 52 | 273 | 584 |    | 1163 |    |
